# Supplementary material
Source: PubMed Central journal article supplement (PMC2141923)

A

**IDE1** ATCAAGCATGTTCTTGC  
*OsNAATI* (-290/-273) ACEATGCATGATCATGC  
*OsNAS2* (-216/-199) TCEATGCATGGATAAATGC

**IDE1m1** CGACCTACGGCTTCTTGC  
**IDE1m11** CGAAAGCATGTTCTTGC  
**IDE1m12** ATCCCTEATGCTTCTTGC  
**IDE1m13** ATCAAGACGGCTTCTTGC  
**IDE1m2** ATCAAGCATTAGGAGGTA  
**IDE1m21** ATCAAGCATTAGTCTTGC  
**IDE1m22** ATCAAGCATGGTGAGTGC  
**IDE1m23** ATCAAGCATGTTCTTGTA  
**IDE1m65** CGACCTEATGCTTAGGTA  
**IDE1m67** CGACCTEATGCGGAGGTA

*HvNAATA* (-307/-290) GAGAAGCATGGTTCATGC  
*HvNAATA* (-195/-178) TGEATGGGTGCTTCTTGC  
*HvNAS1* (-310/-293) CCAACGCAATCTTCATGG  
*HvNAS1* (-188/-214) TAGCCAGCGGGTTTCATGCCTCTCAT  
**IDS3** (-197/-214) ATCAAGATAGATTATCC  
**IDS3** (-169/-195) GATGATGGCGTGAATCAGGCCTCTAGT  
**IDS3** (-144/-121) CTGGAAAGCAAGCATGATCAACGG  
**IDE2** TTGAACGGCAAGTTTCACGCTGTCACT

B

Protein

**IDEF1**

Competitor

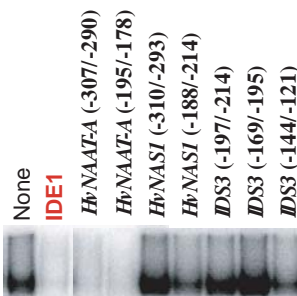

C

Protein

**AK072874**

Competitor

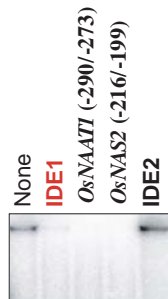

Protein

**AK072874**

Competitor

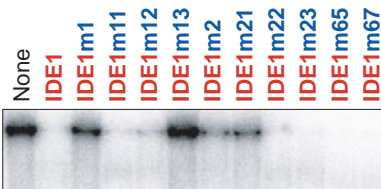

Supplement: pnas_0707010104_1.pdf [file pnas_0707010104_1.pdf]
