# Supplementary material
Source: PubMed Central journal article supplement (PMC2141923)
Supplement: pnas_0707010104_4.pdf [file pnas_0707010104_4.pdf]

# Fe-deficiency signal

IDEF1

?

Other IDE-binding factors

CATGC  
IDE1-like

IDE-like

*Fe-deficiency-responsive genes*

CATGC  
IDE1-like

IDE-like

*OsIRO2*

*OsIRO2*

CACGTGG

*Fe-deficiency-responsive genes*

CACGTGG

*OsNAC4*

NAC4

CACGTGG

AP2-domain  
transcription factor

AP2

unknown  
element

*Fe-deficiency-responsive genes*

unknown  
element

*Fe-deficiency-responsive genes*
