# Supplementary material
Source: PubMed Central journal article supplement (PMC2141923)
Supplement: pnas_0707010104_5.pdf [file pnas_0707010104_5.pdf]

## **Table 1. Primers and oligomers used for subcloning and EMSA**

| primer/oligomer name                          | sequence                                                                                                                                 |
|-----------------------------------------------|------------------------------------------------------------------------------------------------------------------------------------------|
| <i>yeast LacZ assay</i>                       |                                                                                                                                          |
| IDE1 x 3                                      | <u>GCAGTCGAATTCGATATCAAGCATGCTTCTTGCTGCCCATCAAGCATGCTTCTTGCTGCCCATCAAGCATGCTTCTTGCTGCCCGTCGACTCTAGAGCAGTC</u>                            |
| IDE2-IDE1 x 2                                 | <u>AAGCTTGAATTCGATATCTTGAACGGCAAGTTTCACGCTGTCACTATCAAGCATGCTTCTTGCTTGAACGGCAAGTTTCACGCTGTCACTATCAAGCATGCTTCTTGACGCGTCTCGAGTCGCGAATCG</u> |
| <i>EMSA probes</i>                            |                                                                                                                                          |
| IDE1                                          | <u>GATGCTATCATCAAGCATGCTTCTTGCTGCCATCAAGCATGCTTCTTGCTGCCAGAGCATCCCACGA</u>                                                               |
| <i>yeast GAL4 AD fusions</i>                  |                                                                                                                                          |
| OsVP1pGAD-F                                   | <u>GGATCCGTATGGACGCCTCCGCCGGCT</u>                                                                                                       |
| OsVP1pGAD-R                                   | <u>AGATCTTCAGATGCTAACCGCCATCTGGC</u>                                                                                                     |
| AK107456pGAD-F                                | <u>GAATTCCCGGGGATGGGGCAAATGGACGG</u>                                                                                                     |
| AK107456pGAD-R                                | <u>AGATCTCTAGGGATTTGTTGTCTGCTGATG</u>                                                                                                    |
| AK072874pGAD-F                                | <u>GAATTCCCGGGGATGGCCGACACGAGAGGCT</u>                                                                                                   |
| AK072874pGAD-R                                | <u>AGATCTTCAGGTTTCTTAGTCAGCAGGCTG</u>                                                                                                    |
| AK109920pGAD-F                                | <u>GGATCCGTATGGCCGGGGTCAACCAGCAA</u>                                                                                                     |
| AK109920pGAD-R                                | <u>AGATCTTCACATGTGAGGCCCAGACTTTG</u>                                                                                                     |
| AK101356pGAD-F                                | <u>GAATTCCCGGGGATGGCGGGATGGCTGC</u>                                                                                                      |
| AK101356pGAD-R                                | <u>GGATCCCTCAAGCTAAAGCAGCAGCAGAGT</u>                                                                                                    |
| <i>MBP fusions for EMSA</i>                   |                                                                                                                                          |
| OsVP1pMAL-501F                                | <u>GAATTCAGCTCCTACCCATGCCGTCG</u>                                                                                                        |
| OsVP1pMAL-726R                                | <u>TCTAGATCAGATGCTAACCGCCATCTGG</u>                                                                                                      |
| IDEF1pMAL-141F                                | <u>TCTAGAGAATTCCTGCGCCACACGACGA</u>                                                                                                      |
| IDEF1pMAL-362R                                | <u>GTGACGAGCTCCTAGGGATTTGTTGTCTGC</u>                                                                                                    |
| AK072874pMAL-151F                             | <u>GAATTCACGCCATACTCCTTCAATGCATGG</u>                                                                                                    |
| AK072874pMAL-433R                             | <u>TCTAGATCAGGTTTCTTAGTCAGCAGGCTG</u>                                                                                                    |
| AK109920pMAL-1F                               | <u>GGATCCATGGCCGGGGTCAACCAGCAA</u>                                                                                                       |
| AK109920pMAL-289R                             | <u>GGATCCTCACATGTGAGGCCCAGACTTTG</u>                                                                                                     |
| AK101356pMAL-287F                             | <u>GAATTCCCATTTCAAGCATGCACAAAGGG</u>                                                                                                     |
| AK101356pMAL-672R                             | <u>TCTAGATCAGGTTAATCTTTCAGGTGCAGAGC</u>                                                                                                  |
| <i>Probes for Northern blot analysis</i>      |                                                                                                                                          |
| OsIRT1probe-F                                 | <u>CGTCTTCTTCTTCTCCACCACGAC</u>                                                                                                          |
| OsIRT1probe-R                                 | <u>GCAGCTGATGATCGAGTCTGACC</u>                                                                                                           |
| <i>GFP fusions</i>                            |                                                                                                                                          |
| p35SGFP-linker-F                              | <u>TCGACGCCGCGGACTCGAGACAGATCTGTTC</u>                                                                                                   |
| p35SGFP-linker-R                              | <u>CATGGAACAGATCTGTCTCGAGTCCCGGGCC</u>                                                                                                   |
| IDEF1pGFP-F                                   | <u>GTGACATGGGGCAAATGGACGGC</u>                                                                                                           |
| IDEF1pGFP-R                                   | <u>AGATCTGGGGATTTGTTGTCTGCTGATG</u>                                                                                                      |
| <i>IDEF1 introduction to tobacco and rice</i> |                                                                                                                                          |
| IDE1-IDE1-F                                   | <u>GCCCCAAGCTTATCAAGCATGCTTCTTGCCCCACTCTCGCTCTCATTTT</u>                                                                                 |
| IDE1-IDE1-R                                   | <u>GGATCCGCAAGAAGCATGCTTGATGA</u>                                                                                                        |
| IDEF1pIG-F                                    | <u>TCTAGAGAATTCATGGGGCAAATGGACGG</u>                                                                                                     |
| IDEF1pIG-R                                    | <u>GTGACGAGCTCCTAGGGATTTGTTGTCTGCTGC</u>                                                                                                 |

Underlines indicate the IDE sequences in the yeast one-hybrid baits and EMSA probes, as well as the restriction enzyme sites in the primers used for subcloning.
