# Supplementary material
Source: PubMed Central journal article supplement (PMC2141923)

# Leaf SPAD value

Effector

0 10 20 30 40 50

**VC**

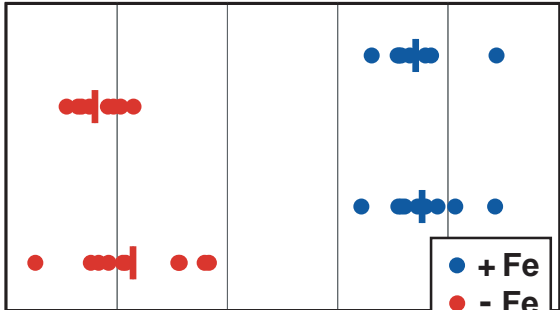

**35S-*IDEF1***

● + Fe  
● - Fe

Supplement: pnas_0707010104_2.pdf [file pnas_0707010104_2.pdf]

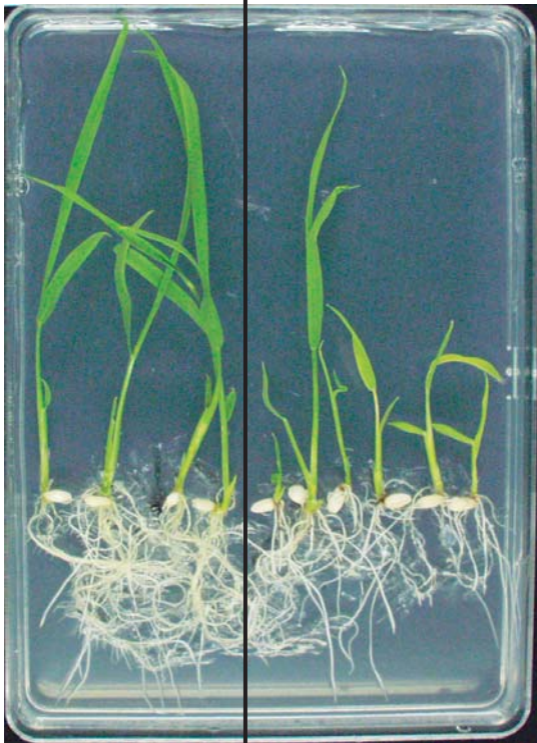

**NT**

**35S-  
*IDEF1***

Supplement: pnas_0707010104_3.pdf [file pnas_0707010104_3.pdf]
